# Supplementary material for: Stellettin B Induces Cell Death in Bladder Cancer Via Activating the Autophagy/DAPK2/Apoptosis Signaling Cascade
Source: MDPI journal article supplement (doi:10.3390/md21020073), 2023-01-21

**Figure 2F**

Caspase 3 proform

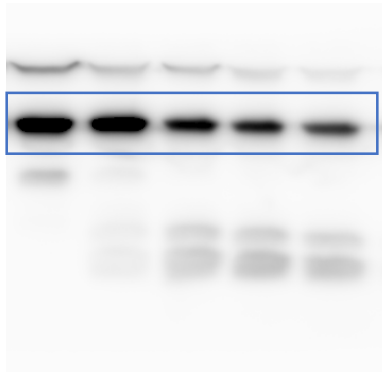

Cleaved caspase 3

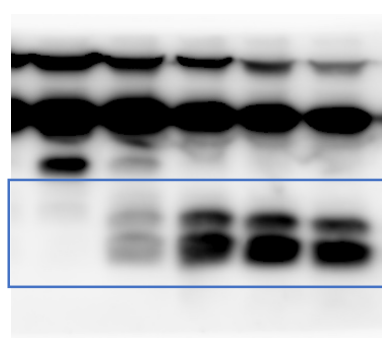

Caspase 8

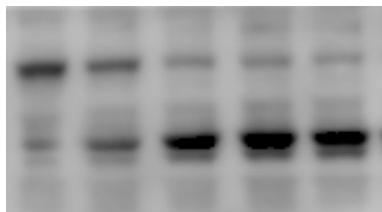

Caspase 9

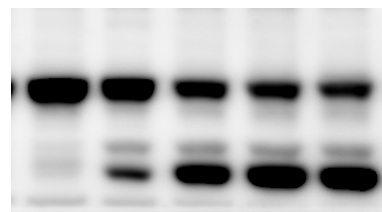

$\gamma$ H2AX

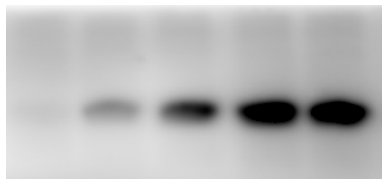

PARP

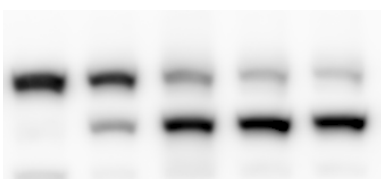

GAPDH

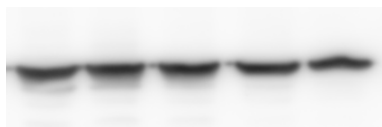

**Figure 3C**

FGFR3

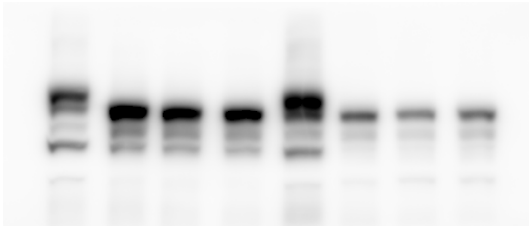

p-FGFR3 (Y742)

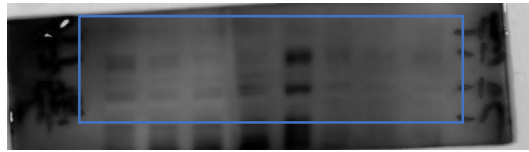

AKT

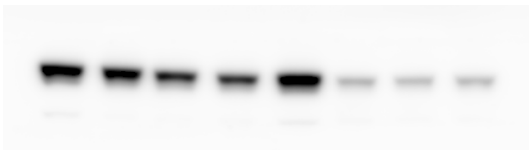

p-AKT (T308)

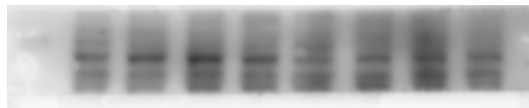

pAKT (S473)

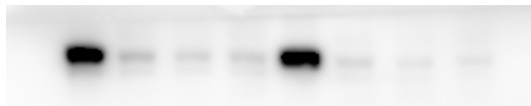

ERK

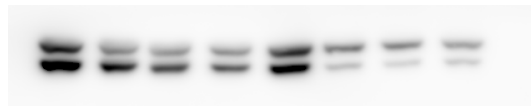

p-ERK (T202/Y204)

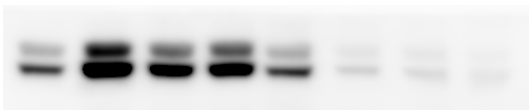

STAT3

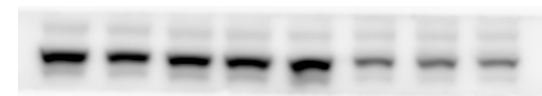

p-STAT3 (Y705)

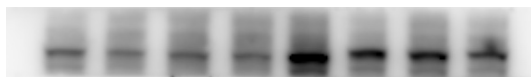

p-STAT3 (S727)

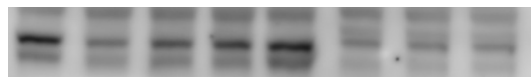

GAPDH

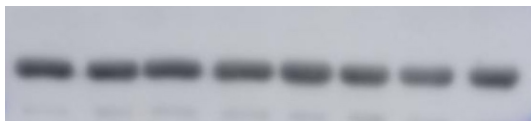

**Figure 4C**

ATG9B

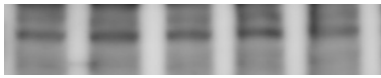

DAPK2

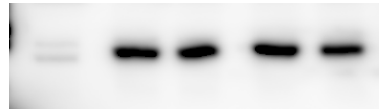

GAPDH

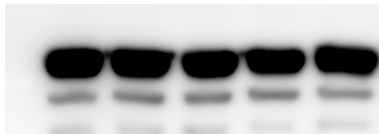

**Figure 4D**

LC3

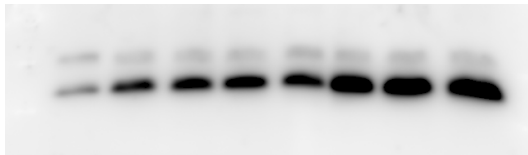

p62

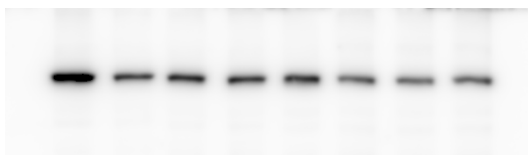

GAPDH

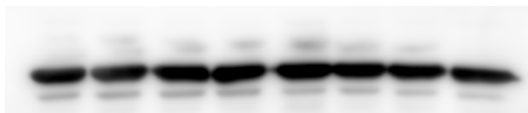

Figure 5A

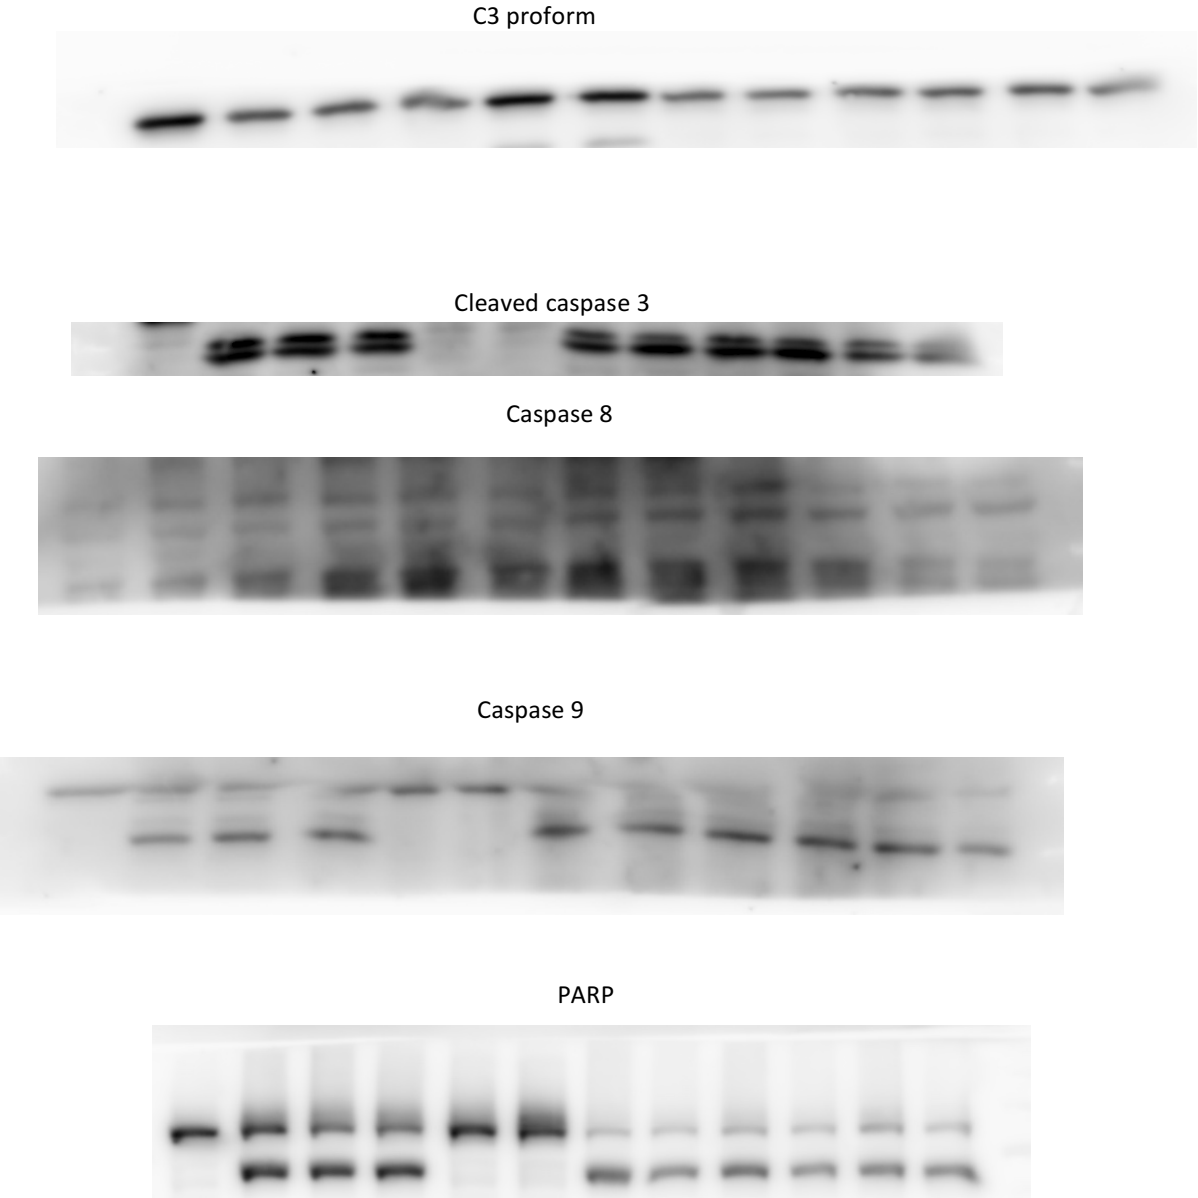

LC3

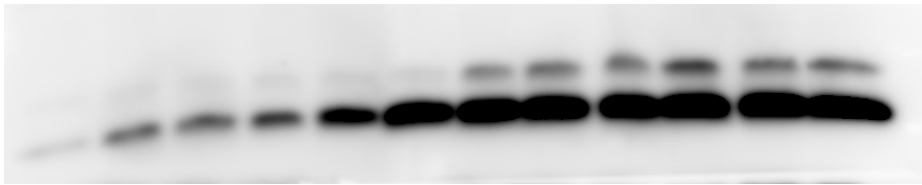

p62

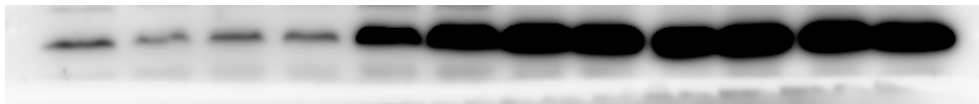

ATG5

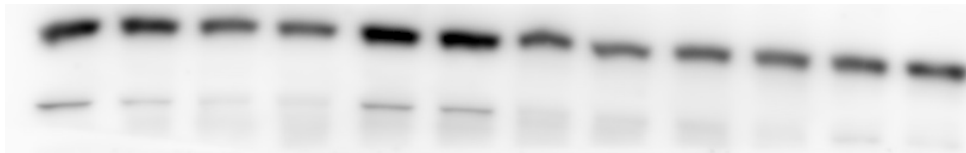

GAPDH

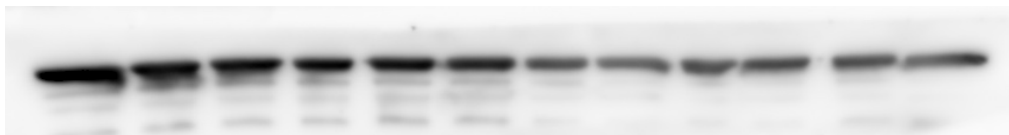

**Figure 5B**

Caspase 3 proform

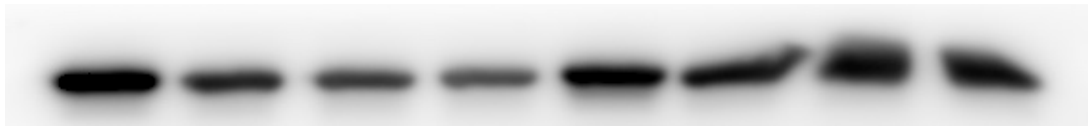

Cleaved Caspase 3

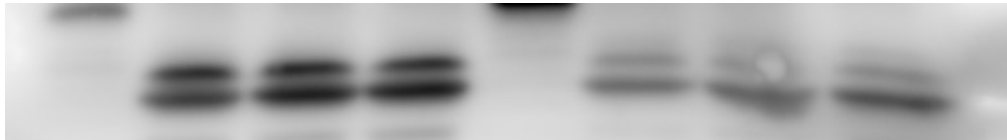

Caspase 8

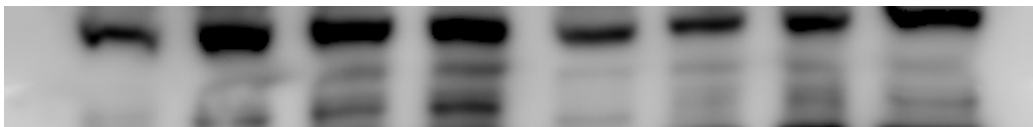

Caspase 9

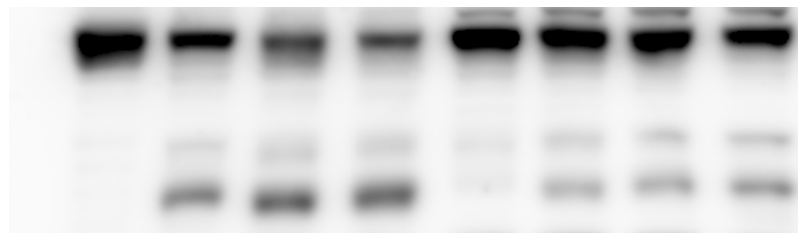

PARP

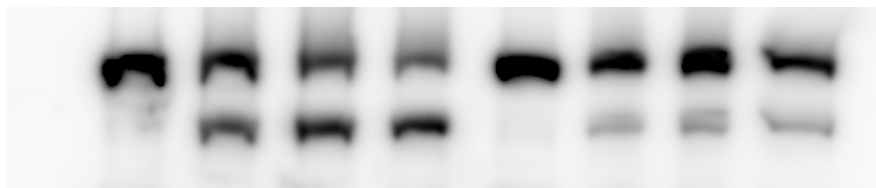

LC3

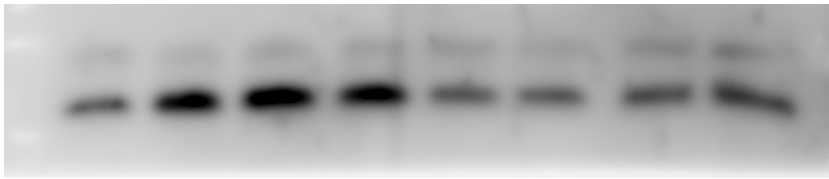

p62

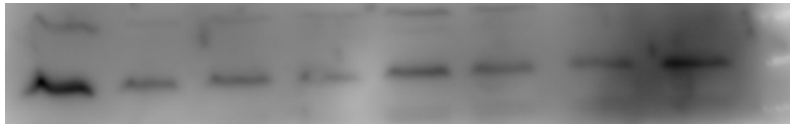

ATG5

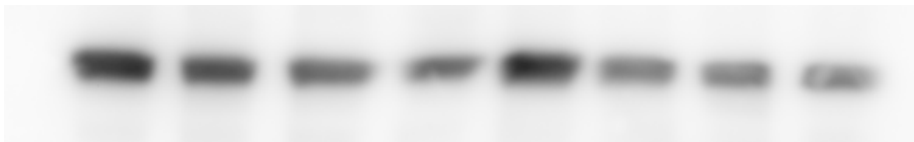

GAPDH

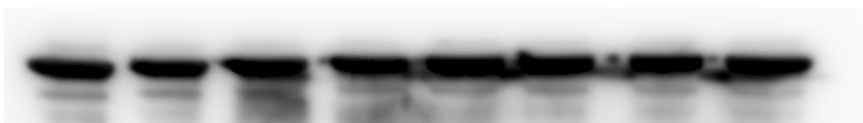

**Figure 5D**

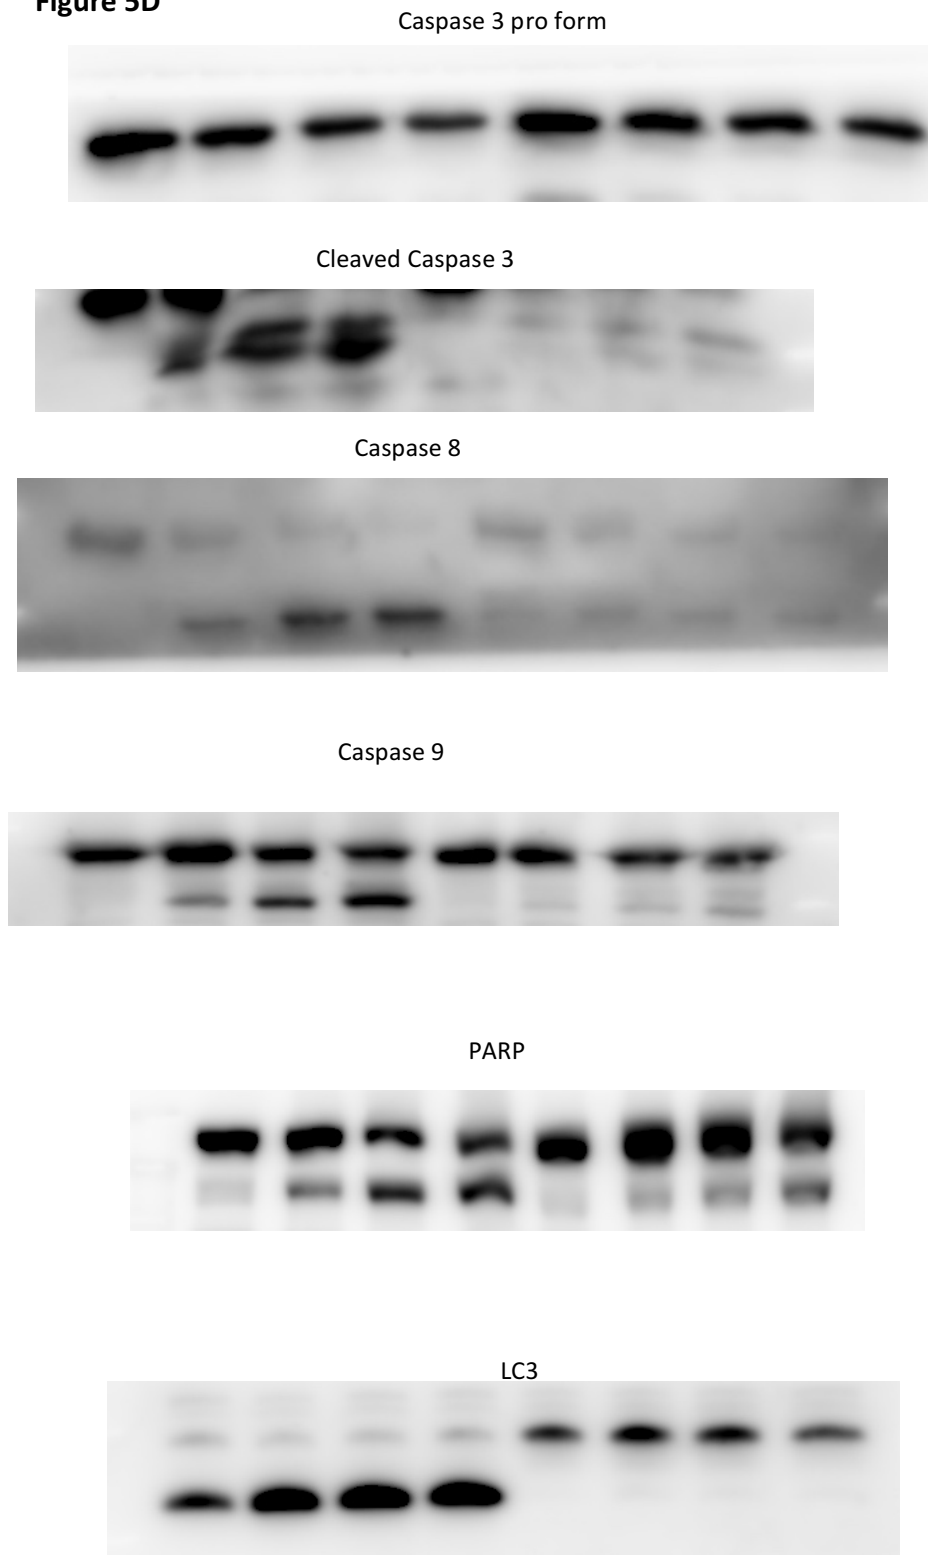



p62

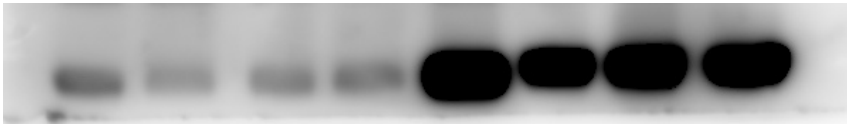

ATG5

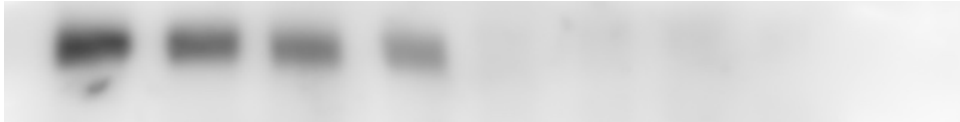

GAPDH

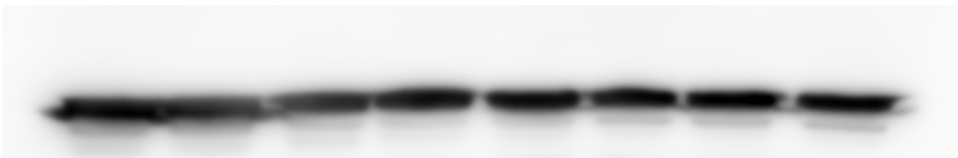

Figure 6A

ATG5

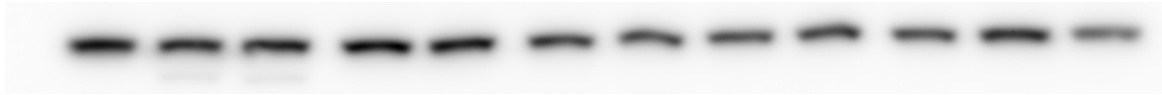

DAPK2

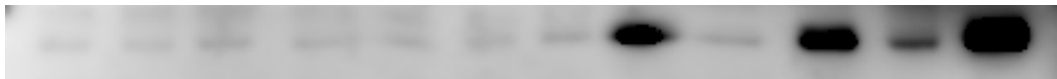

LC3B

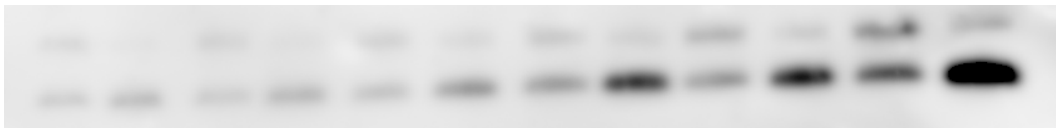

p62

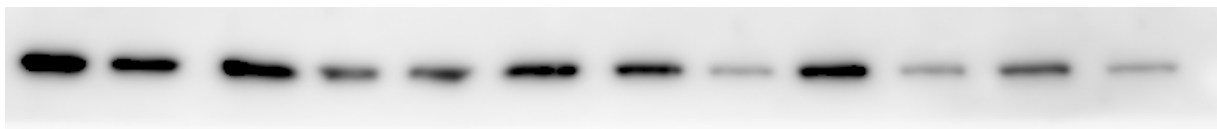

GAPDH

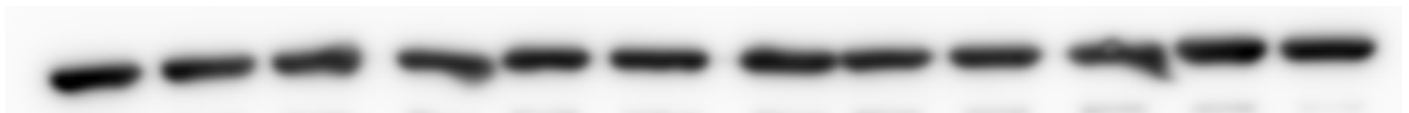

**Figure 6B**

DAPK2

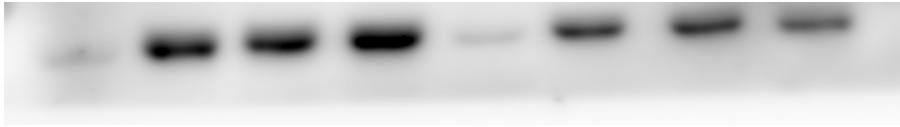

GAPDH

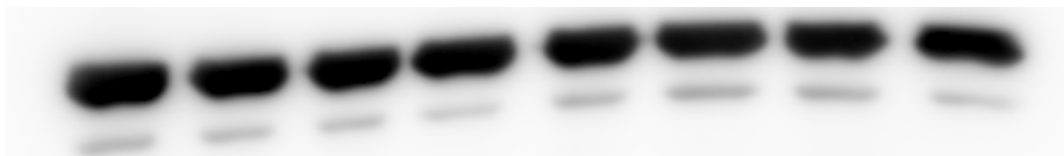

Figure 6D

DAPK2

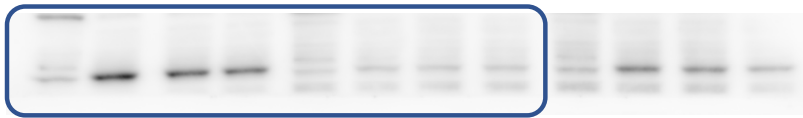

Caspase 3 pro form

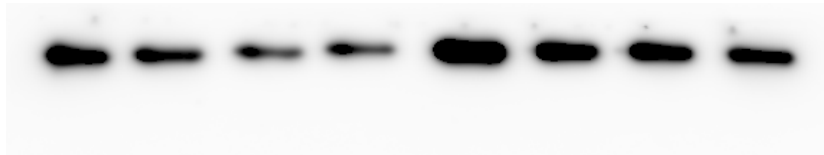

Cleaved Caspase 3

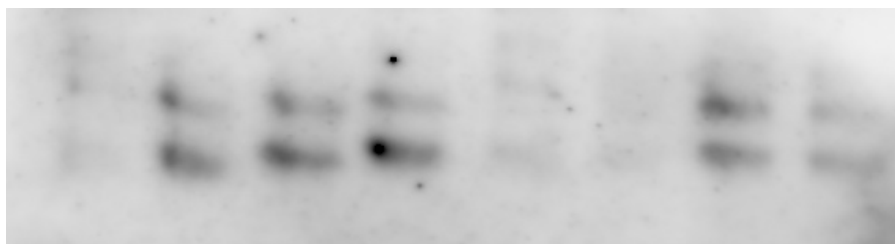

Caspase 8

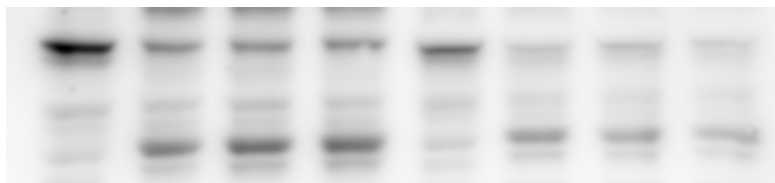

Caspase 9

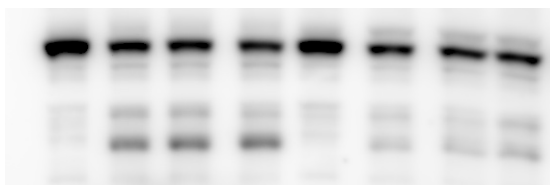

$\gamma$ H2AX

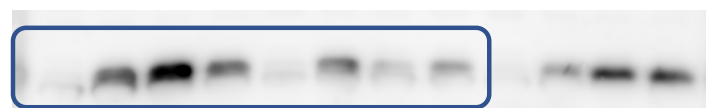

PARP

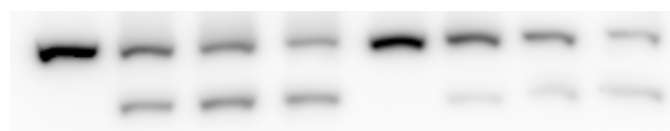

GAPDH

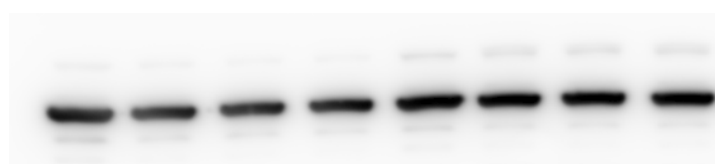

**Figure 6E**

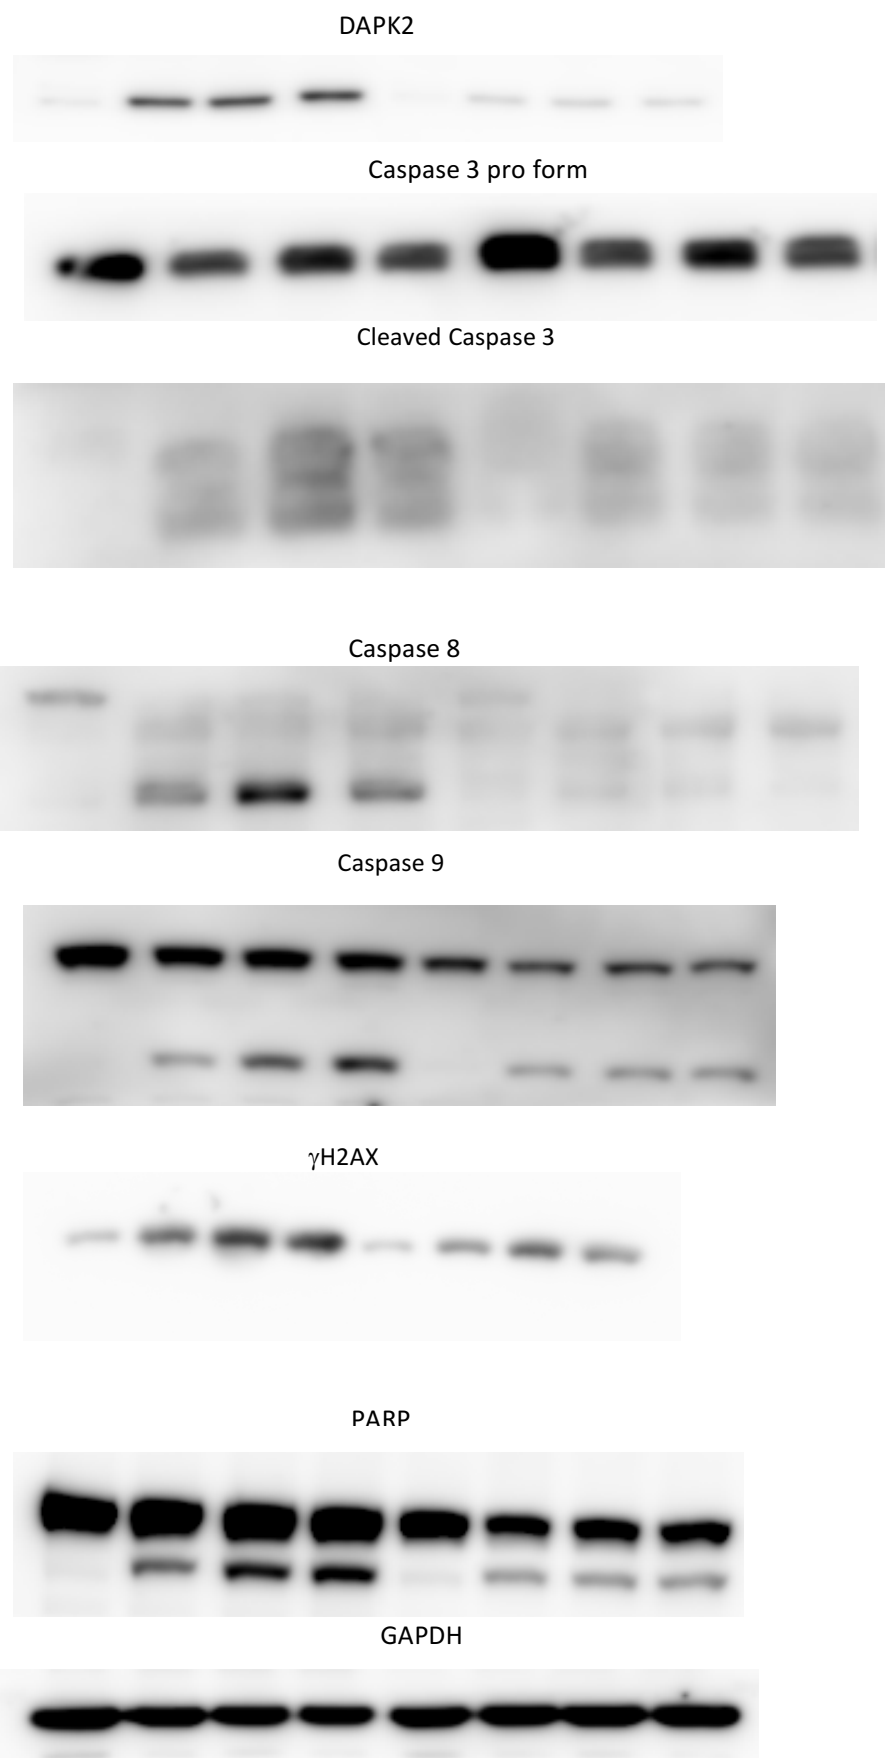

**Figure 7B**

FGFR3

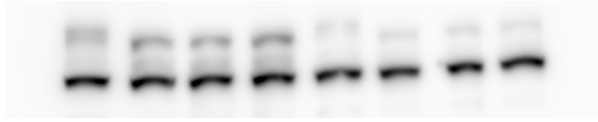

p62

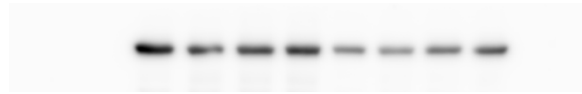

LC3

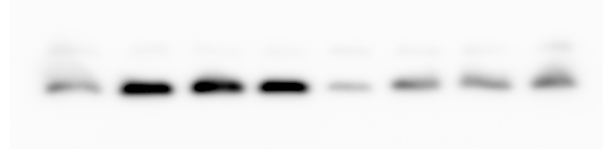

p-mTOR (S2448)

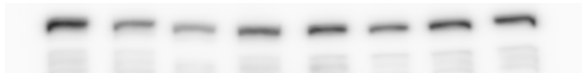

ATG5

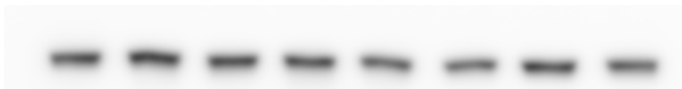

GAPDH

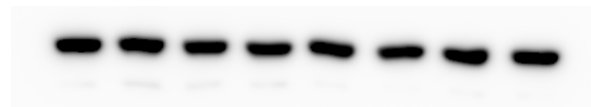

**Figure 7C**

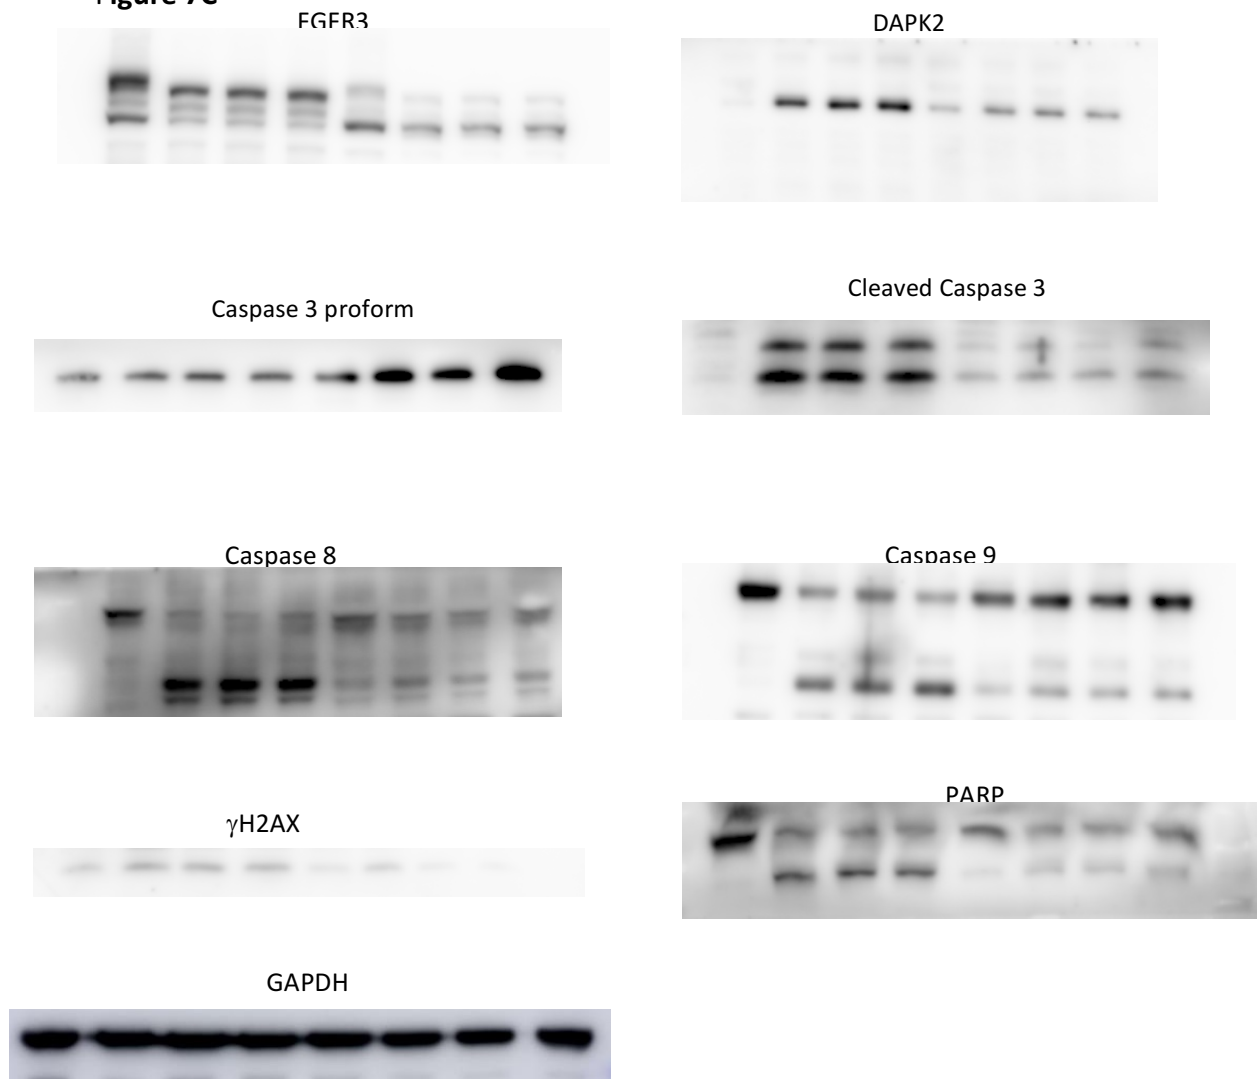

**Figure S1A**

DAPK2

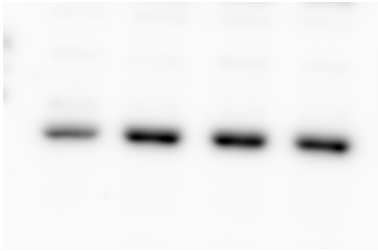

p62

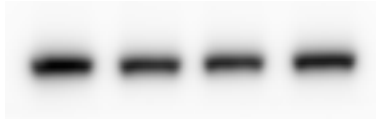

LC3

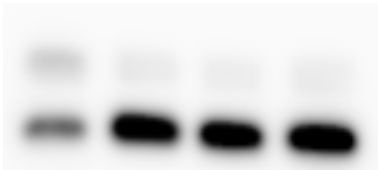

GAPDH

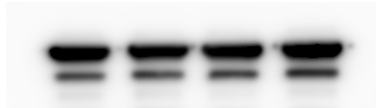

**Figure S1B**

FGFR3

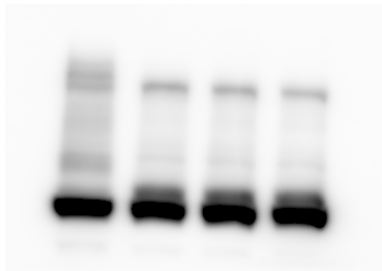

Caspase 3 proform

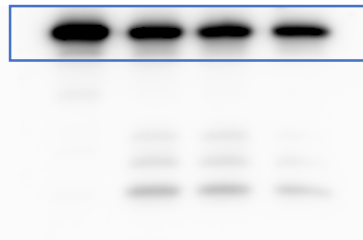

Cleaved Caspase 3

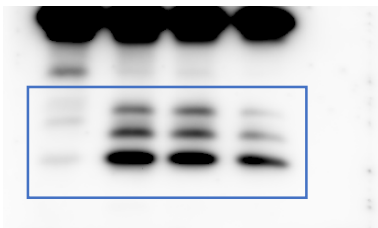

Caspase-8

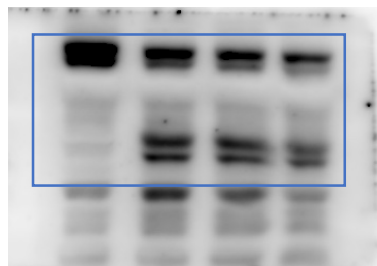

Caspase-9

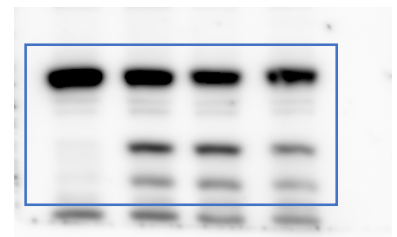

H2AX

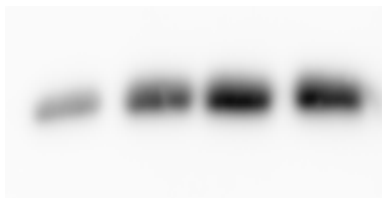

PARP

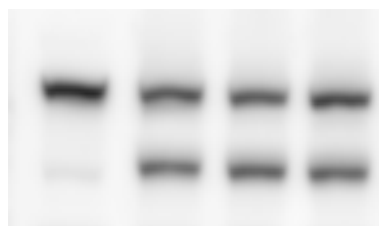

GAPDH

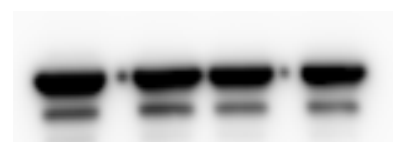

Supplement: s1 [file s1]
