# Supplementary material for: Stellettin B Induces Cell Death in Bladder Cancer Via Activating the Autophagy/DAPK2/Apoptosis Signaling Cascade
Source: MDPI journal article supplement (doi:10.3390/md21020073), 2023-01-21
Supplement: s1 [file s1]

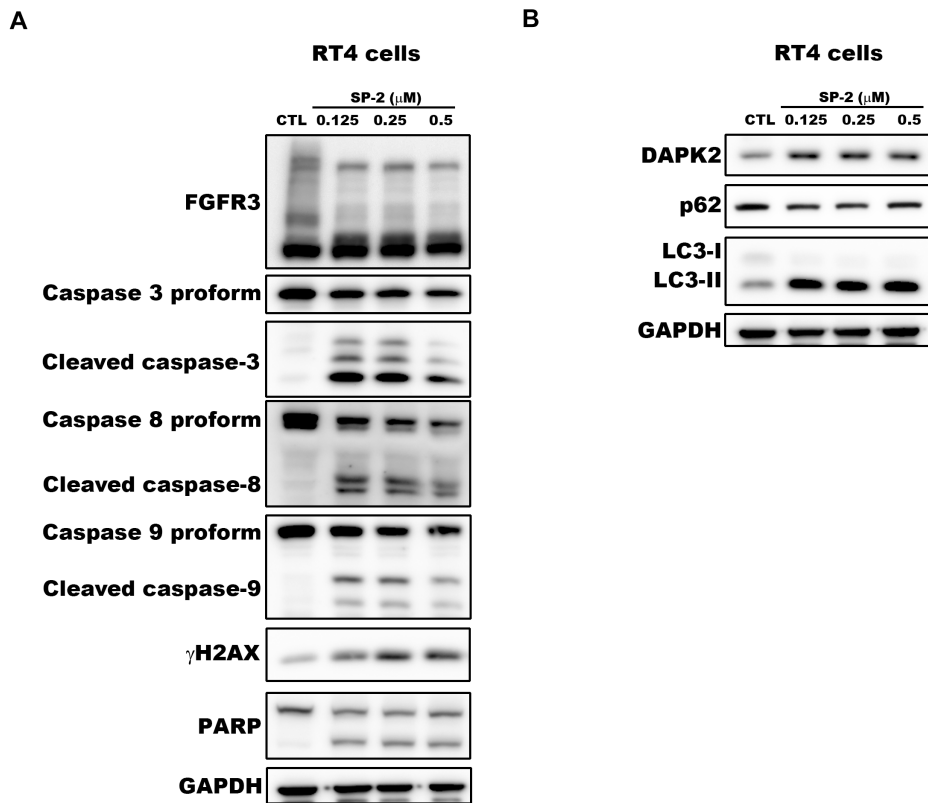

**Figure S1. SP-2 induces autophagy and apoptosis in RT4 cells.** (A). SP-2 causes band-shift of FGFR3-TACC3 fusion protein and induces apoptosis in RT4 cells. Cells were treated with different concentrations of SP-2 for 48 h, and subjected to western blotting using the indicated antibodies. (B) SP-2 induces DAPK2 expression and autophagy in RT4 cells. Cells were treated with different concentrations of SP-2 for 24 h, and subjected to western blotting using the indicated antibodies

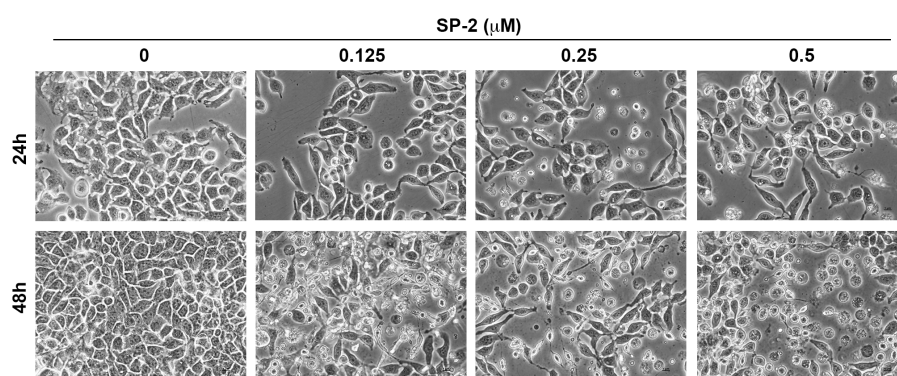

**Figure S2. Morphological changes of RT-112 cells after the treatment of SP-2.** RT-112 cells were treated with different concentrations of SP-2 for 24h and 48h, and the morphological changes were recorded by light microscopy. Scale bar = 1  $\mu$ m.



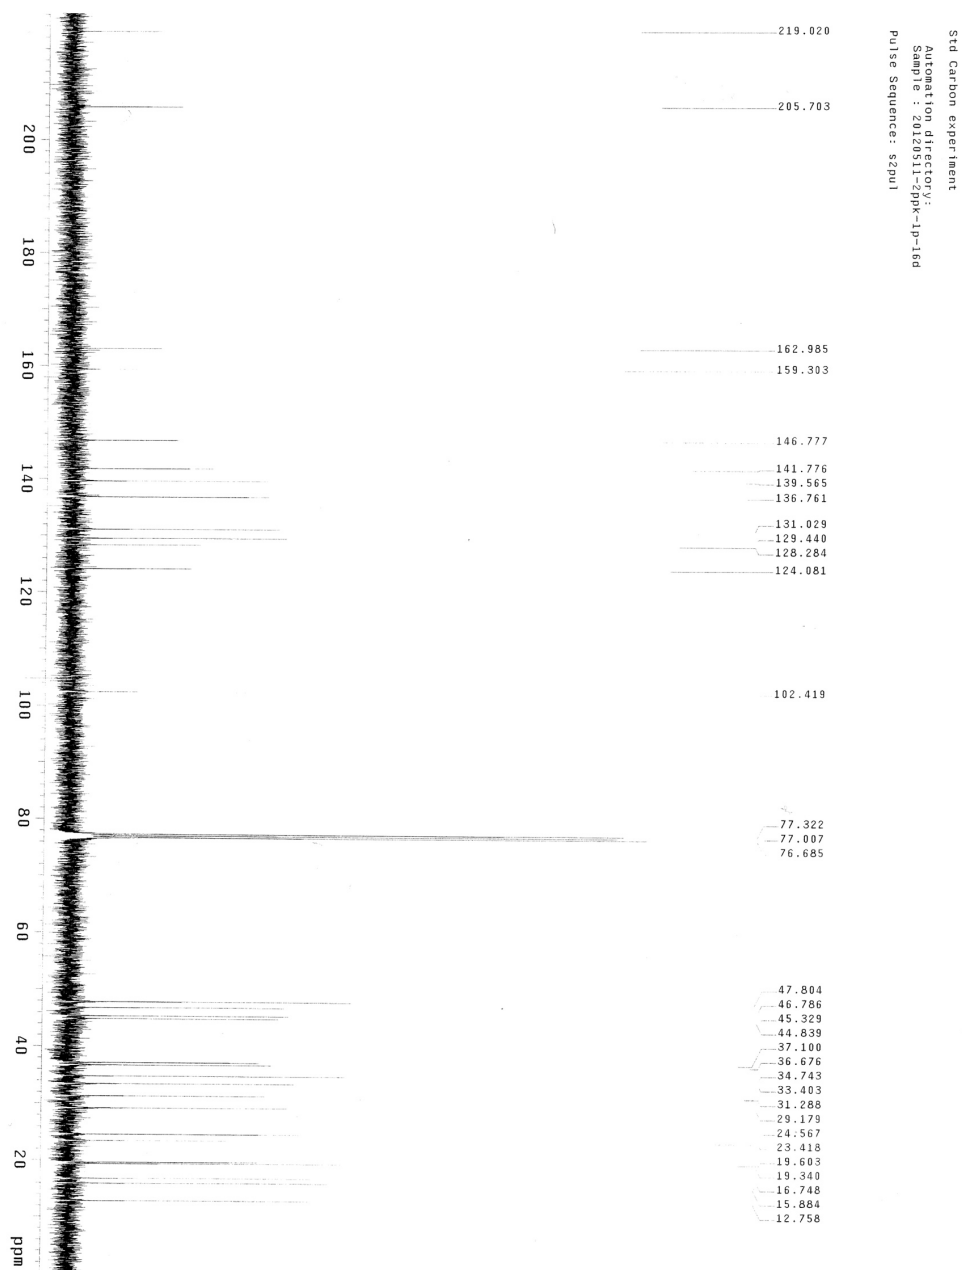

Figure S4.  $^{13}\text{C}$  NMR spectrum of SP-2 in  $\text{CDCl}_3$  at 100 MHz.
